# Supplementary material for: Clinical Research of Lupus Retinopathy: Quantitative Analysis of Retinal Vessels by Optical Coherence Tomography Angiography in Patients with Systemic Lupus Erythematosus
Source: MDPI journal article supplement (doi:10.3390/diagnostics13203222), 2023-10-16
Supplement: s1 [file s1]

**Table S1.** The P value of correlation analysis between OCTA data and rheumatologic data related to disease activity

|                                | SLEDAI | anti-dsDNA | C3    | C4    | WBC   | PLT   |
|--------------------------------|--------|------------|-------|-------|-------|-------|
| superficial whole density      | 0.450  | 0.962      | 0.742 | 0.182 | 0.950 | 0.542 |
| superficial foveal density     | 0.381  | 0.821      | 0.802 | 0.699 | 0.182 | 0.191 |
| superficial parafoveal density | 0.421  | 0.622      | 0.958 | 0.382 | 0.914 | 0.501 |
| superficial perifovea density  | 0.458  | 0.995      | 0.748 | 0.202 | 0.833 | 0.561 |
| deep whole density             | 0.370  | 0.303      | 0.421 | 0.604 | 0.343 | 0.417 |
| deep foveal density            | 0.998  | 0.816      | 0.828 | 0.780 | 0.228 | 0.133 |
| deep parafoveal density        | 0.262  | 0.093      | 0.204 | 0.403 | 0.314 | 0.749 |
| deep perifovea density         | 0.462  | 0.318      | 0.505 | 0.689 | 0.325 | 0.286 |
| CMT( $\mu$ m)                  | 0.829  | 0.351      | 0.441 | 0.064 | 0.793 | 0.749 |
| FAZ                            | 0.682  | 0.775      | 0.794 | 0.959 | 0.104 | 0.153 |
| FD-300                         | 0.727  | 0.642      | 0.692 | 0.907 | 0.776 | 0.929 |
